# Supplementary material for: Synthesizing tubular and trapezoidal shaped ZnO nanowires by an aqueous solution method
Source: Royal Society of Chemistry journal article supplement (doi:10.1039/c3nr34013a), 2013-01-01
Supplement: c3nr34013a.pdf [file c3nr34013a.pdf]

## Supplementary Data for:

# Synthesizing Tubular and Trapezoidal Shape of ZnO Nanowires by Aqueous Solution Method

Majid Taghavi<sup>a,b</sup>, Virgilio Mattoli<sup>b</sup>, Barbara Mazzolai<sup>b</sup>, Carlo Filippeschi<sup>a,b</sup> and Lucia Beccai<sup>b</sup>

<sup>5</sup> Received (in XXX, XXX) Xth XXXXXXXXXX 20XX, Accepted Xth XXXXXXXXXX 20XX

DOI: 10.1039/b000000x

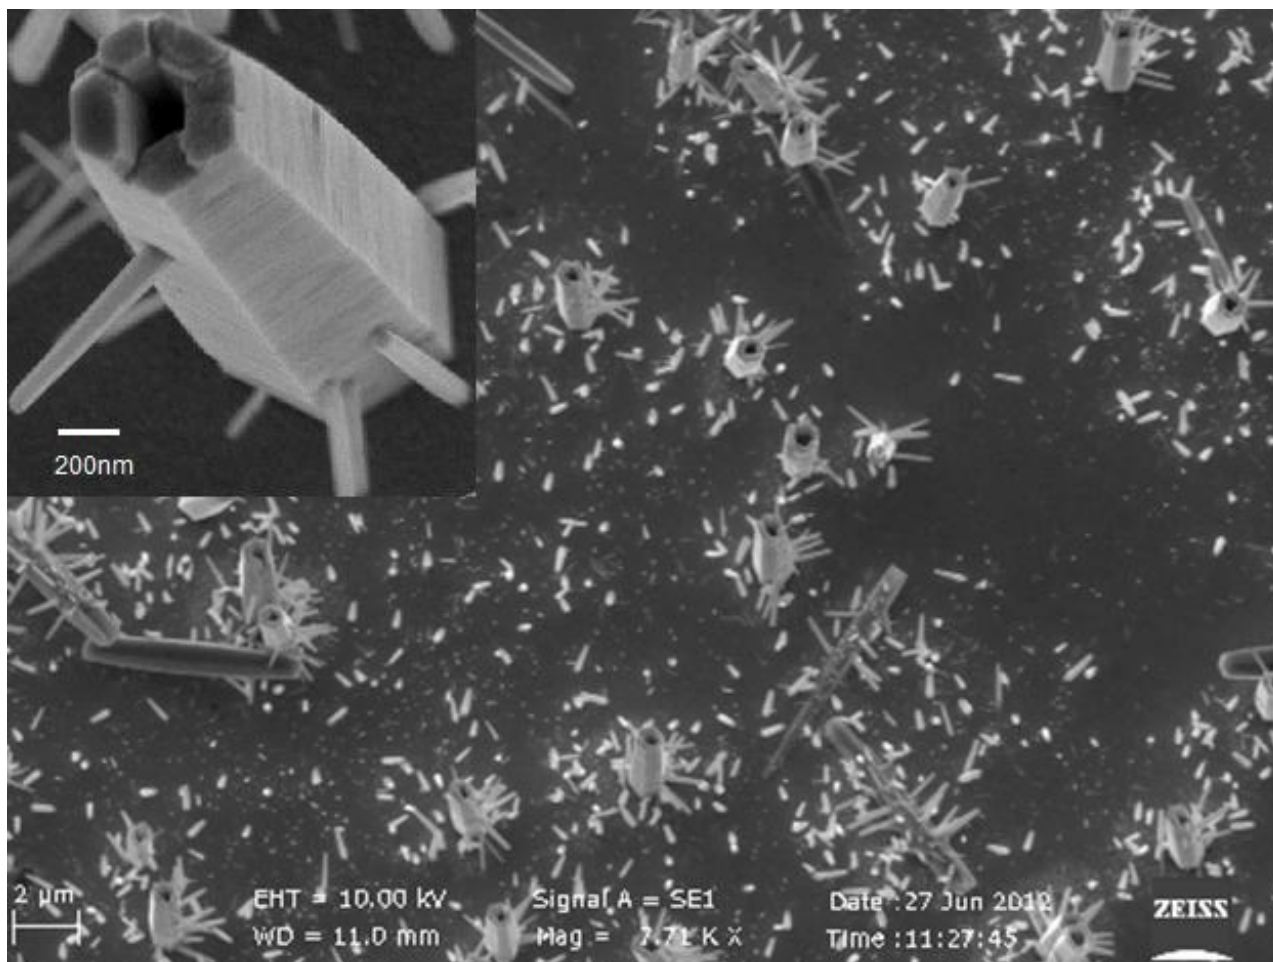

**Fig. S1** Figure S1. SEM image is showing hollow NWs. They are the result of a 2<sup>nd</sup> growing process performed by electrochemical method, from prior chemically grown NWs (ECG-CG-H-NWs sample). The temperature used in both growing processes was the same (85°C). Individual NWs grew on the Au layer previously deposited on the substrate and on the walls of prior NWs.

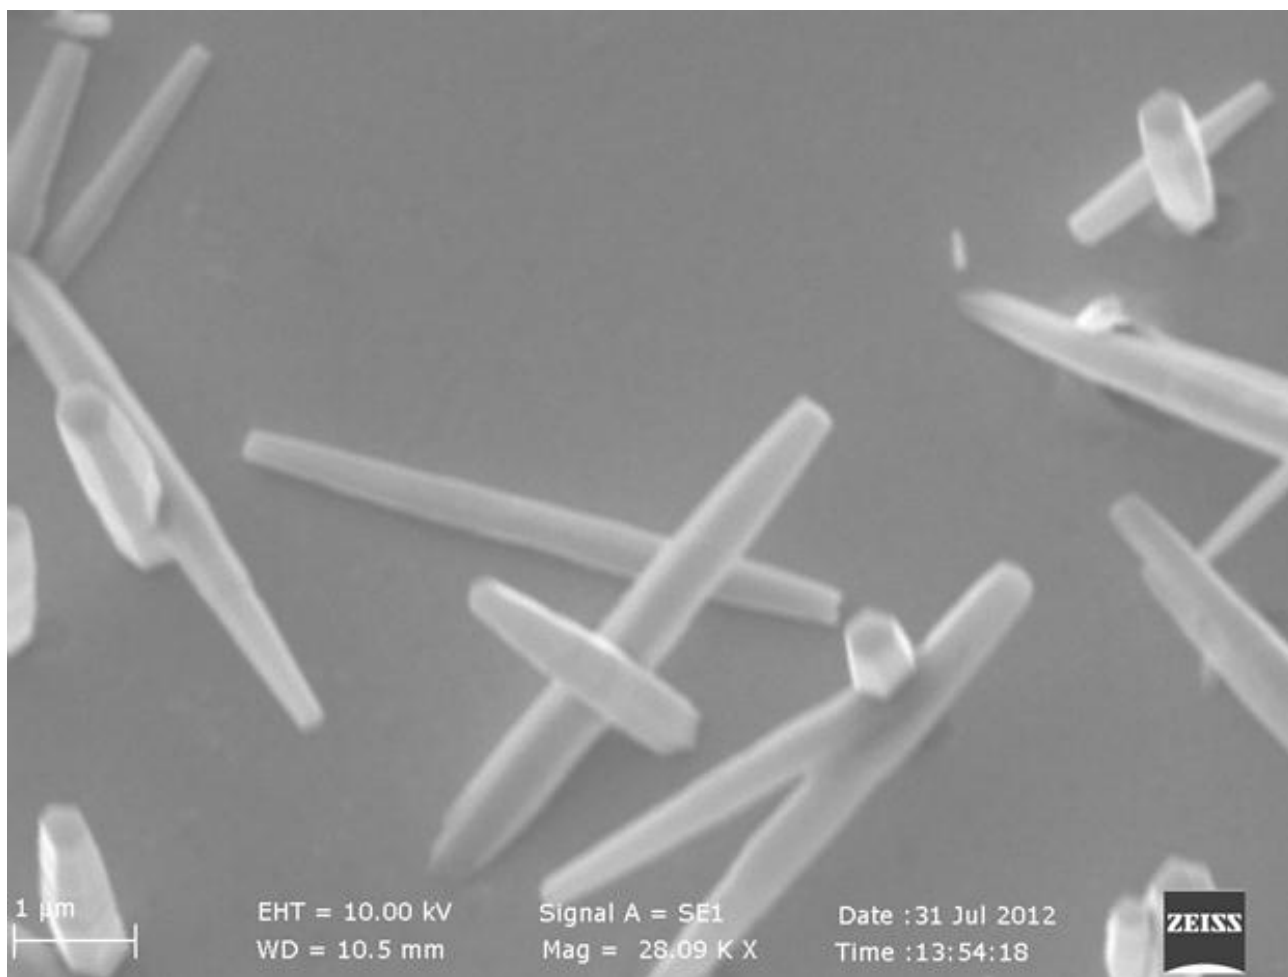

**Fig. S2** SEM image is showing the result of the 2<sup>nd</sup> growing process performed by chemical method to develop hollow ZnO NWs from prior electrochemically grown NWs (CG-ECG-H-NWs sample). The substrate was placed in the nutrient solution and a temperature gradient from room temperature to 85°C was applied at a rate of 10 °C /min in the oven. New wires grew connected onto prior NWs.

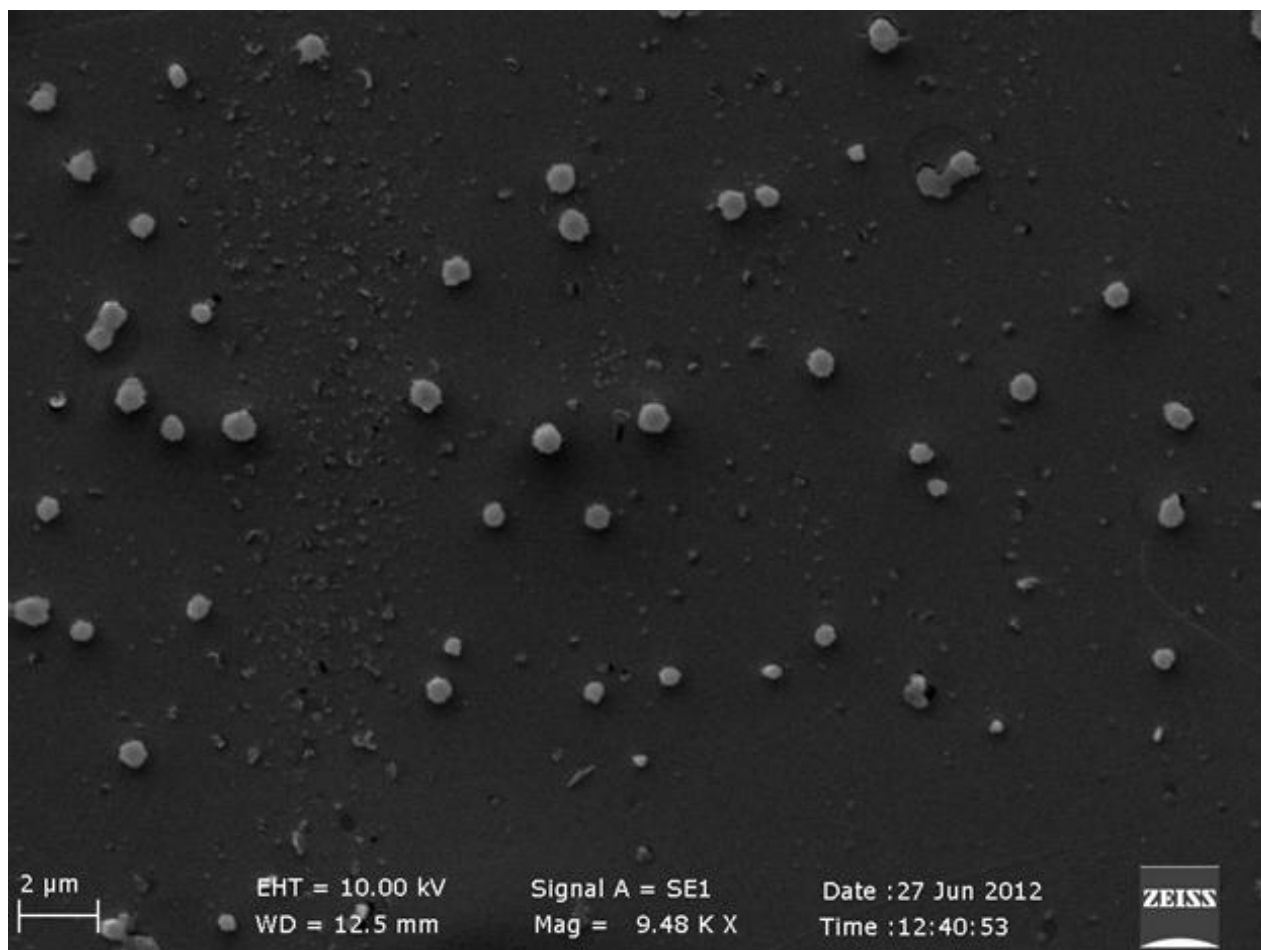

**Fig. S3** SEM image is showing bottom sides of ZnO CG-NWs which originated after removing the Si substrate followed by etching a thin layer of PMMA. Deposition of an 20nm Au layer by evaporation method was accomplished, which makes the tips to work as hexagonal seeds for growing NTs.

## 5 Notes

Abbreviations: ZnO-NW, ZnO nanowire; ZnO-NT, ZnO nanotube.

<sup>a</sup> BioRobotics Institute, Scuola Superiore Sant'Anna, Pisa, Italy. Fax: + 39 050 883402; Tel: + 39 050 883038; E-mail: [m.taghavi@sssup.it](mailto:m.taghavi@sssup.it)

<sup>10</sup> <sup>b</sup> Center for MicroBioRobotics@SSSA, Istituto Italiano di Tecnologia, Viale Rinaldo Piaggio 34, 56025 Pontedera (PI), Italy. Fax: + 39 050 883101; Tel: + 39 050 883417; E-mail: [virgilio.mattoli@iit.it](mailto:virgilio.mattoli@iit.it)
